# Supplementary material for: Effects of abaloparatide and teriparatide on bone resorption and bone formation in female mice
Source: PubMed Central journal article supplement — Bone Rep. 2020 Jun 26;13:100291. doi: 10.1016/j.bonr.2020.100291 (PMC7330158; doi:10.1016/j.bonr.2020.100291), 2020-06-26
Supplement: mmc1.pdf [file mmc1.pdf]

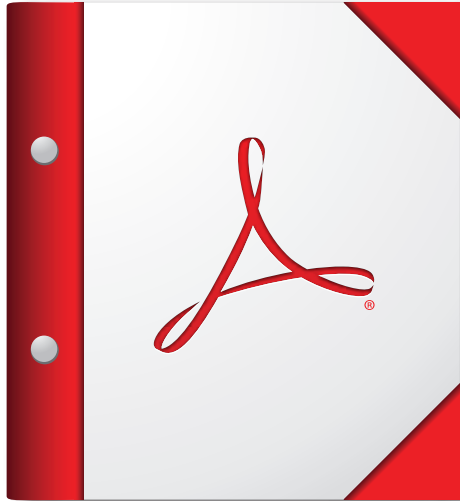

**For the best experience, open this PDF portfolio in  
Acrobat X or Adobe Reader X, or later.**

[Get Adobe Reader Now!](#)
